# Supplementary material for: Enhanced As (V) Removal from Aqueous Solution by Biochar Prepared from Iron-Impregnated Corn Straw
Source: Hindawi journal article supplement (doi:10.1155/2018/5137694), 2018-01-01
Supplement: f1 [file 5137694.f1.pdf]

# **Enhanced As (V) removal from aqueous solution by biochar prepared from iron-impregnated corn straw**

Jiaming. Fan<sup>1</sup>, Xin Xu<sup>1</sup>, Qunli. Ni<sup>1</sup>, Qi Lin<sup>1,2\*</sup>, Jing Fang<sup>1</sup>, Qian Chen<sup>1</sup>, Xiaodong.

Shen<sup>3</sup>, Liping. Lou<sup>1,2</sup>

<sup>1</sup>*Department of Environmental Engineering, Zhejiang University, Hangzhou, 310058,*

*PR China*

<sup>2</sup> *Key Laboratory of Water Pollution Control and Environmental Safety of Zhejiang*

*Province*

<sup>3</sup>*Institute of Hangzhou Environmental Science, Hangzhou 310014, China*

## **Appendix A. Supplementary material**

**Table S1** Sequential chemical extraction method for As-load biochar

**Figure S1** Effect of CS-Fe dose on the adsorption of As(V) (Experiment condition: the initial concentration of As(V) was 40 mg L<sup>-1</sup>. The solid-to-liquid ratio was 5.0 g L<sup>-1</sup> and stirred with 200 r min<sup>-1</sup> at 30°C for 6 h.)

**Figure S2** Diagrams of As (V) species versus pH.

**Table S1** Sequential chemical extraction method for As-load biochar [20].

| fractions                         | extractants                                                                                                                     | operation condition                                                          | mechanism involved                                   |
|-----------------------------------|---------------------------------------------------------------------------------------------------------------------------------|------------------------------------------------------------------------------|------------------------------------------------------|
| exchangeable As                   | 0.05 M (NH <sub>4</sub> ) <sub>2</sub> SO <sub>4</sub> ,<br>pH5.4                                                               | room temperature,<br>shaken for 4 h, liquid:<br>biochar=100:3                | anions exchange<br>SO <sub>4</sub> →AsO <sub>4</sub> |
| specialy adsorbed As              | 0.05 M (NH <sub>4</sub> ) <sub>2</sub> HPO <sub>4</sub> ,<br>pH7.0                                                              | room temperature,<br>shaken for 4 h, liquid:<br>biochar=100:3                | anions exchange<br>PO <sub>4</sub> →AsO <sub>4</sub> |
| bound to amorphous<br>iron oxides | 0.2 M<br>(NH <sub>4</sub> ) <sub>2</sub> C <sub>2</sub> O <sub>4</sub> /H <sub>2</sub> C <sub>2</sub> O <sub>4</sub> ,<br>pH3.0 | room temperature,<br>shaken for 4 h in the<br>dark, liquid:<br>biochar=100:3 | dissolution                                          |

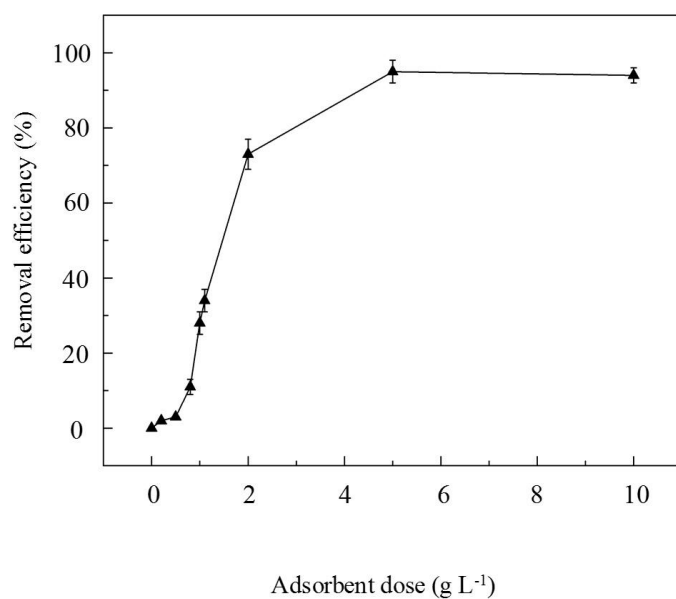

**Figure S1** Effect of CS-Fe dose on the adsorption of As(V) (Experiment condition: the initial concentration of As(V) was 40 mg L<sup>-1</sup>. The solid-to-liquid ratio was 5.0 g L<sup>-1</sup> and stirred with 200 r m

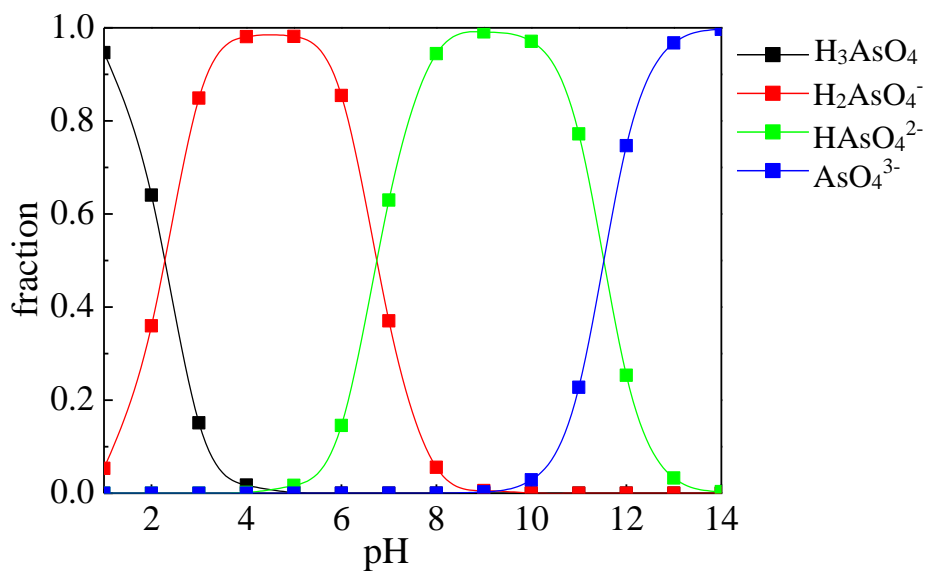

**Figure S2** Diagrams of As (V) species versus pH.
